# Supplementary material for: Cytokinin Biosynthesis Is Affected by Selenium and Nitrate Availabilities to Regulate Shoot and Root Growth in Rice Seedlings
Source: MDPI journal article supplement (doi:10.3390/nitrogen5010013), 2024-03-04
Supplement: s1 [file s1]

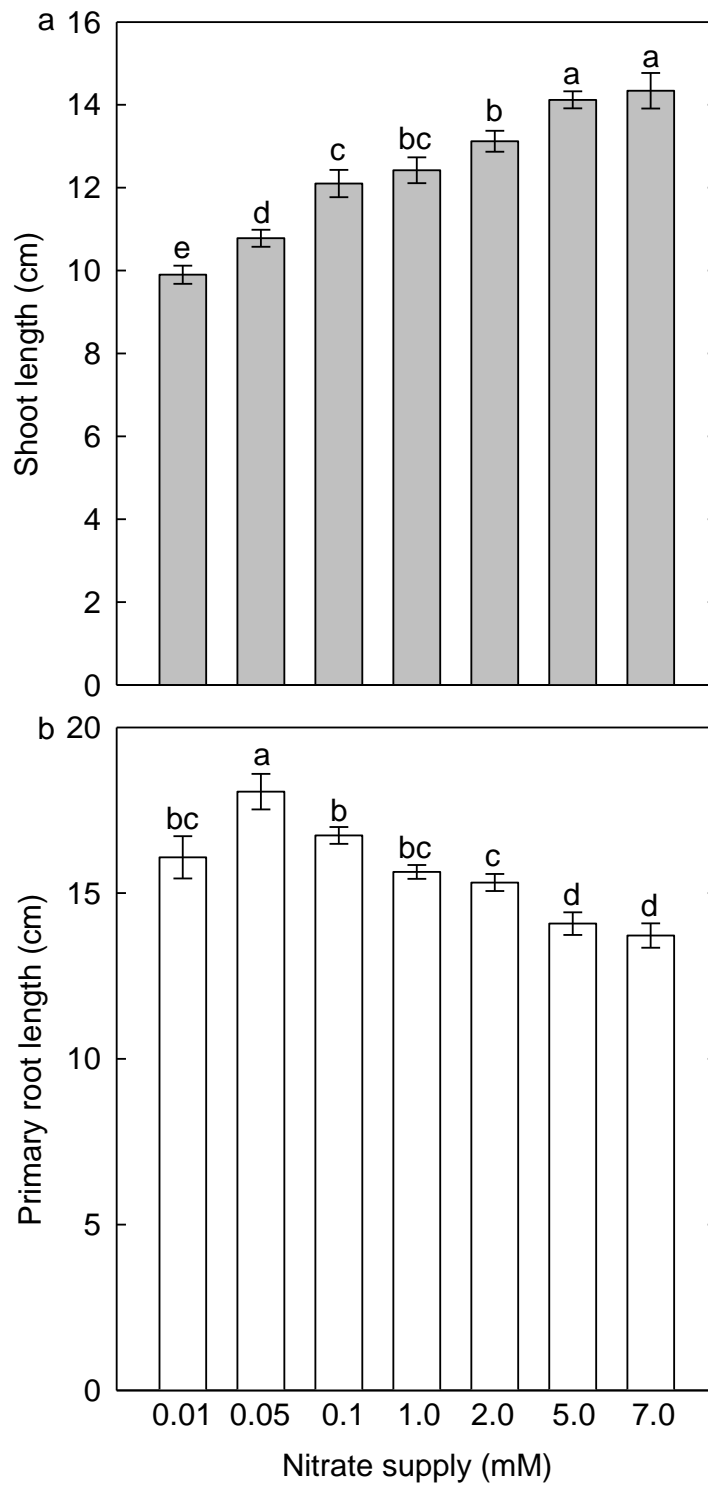

**Figure S1.** Effect of nitrate on shoot and root of rice seedlings. Length of shoot and primary root were assayed 7 days from the start of rice seedlings incubation in nitrate solutions. **a** Nitrate dose-response curve for shoot length. **b** Nitrate dose-response curve for primary root length. Values with the same letter do not differ statistically at the 5% level by Duncan test. Data are mean  $\pm$  standard error of three separate experiments, with five replicates of 10 seedlings each.

**Table S1.** Primers sequences used for real-time PCR

| Name            | Primer sequences         |                          |
|-----------------|--------------------------|--------------------------|
|                 | Forward                  | Reverse                  |
| <i>OsEXP13</i>  | ACCAAAGGGTTCCTTGCATGA    | ACTTGGAGCCCTTCACGTCC     |
| <i>OsEXPA8</i>  | TACACCTCCTCGGCTCAGTTCTAC | TGCCACGTCGATCAAAGCATAC   |
| <i>OsEXPA14</i> | CCCGGTTATCTACCAAAGGGTTCC | AGTCGTGCCCCGTTAATGGTAAAC |
| <i>OsEXPB2</i>  | CAACCAGTACCCGTTTCATGTCC  | GTTGTTGGTGCACCGTATCTGG   |
| <i>OsEXPB3</i>  | TGCGGGTTCAAGAACACCAACC   | GGGTGGTTGACGCATCTTATCTGG |
| <i>OsXTH2</i>   | TGATCGCGTTCTTCGTGGAC     | TCCACAGGCTGGAGTAGAGC     |
| <i>OsXTH4</i>   | TCTGGAATGCCGATGACTGG     | GCAAGCGATAGCCCTGTAGT     |
| <i>OsXTH13</i>  | GGTGTTCCGCAACTACCAGA     | CCCATATGCTCGAGTAGGCG     |
| <i>OsXTH15</i>  | CAGTGTGACATCACGTGGGA     | TTGGTCCGGAGCATACAACC     |
| <i>OsUBQ5</i>   | ACCACTTCGACCGCCACTACT    | ACGCCTAAGCCTGCTGGTT      |
| <i>OsACTIN</i>  | TGGATTGGAGGATCCATCTTGGC  | CCTTGGCAATCCACATCTGCTG   |
